# Supplementary material for: Correlation of growth temperature with stress, defect states and electronic structure in an epitaxial GaN film grown on c-sapphire via plasma MBE
Source: Royal Society of Chemistry journal article supplement (doi:10.1039/c6cp00484a), 2016-01-01
Supplement: c6cp00484a1.pdf [file c6cp00484a1.pdf]

## Correlation of growth temperature with stress, defect states and electronic structure in epitaxial GaN film grown on c-sapphire *via* Plasma MBE

Shibin Krishna<sup>†,a</sup>, Neha Aggarwal<sup>†,a</sup>, Monu Mishra<sup>†,a</sup>, K.K Maurya<sup>b</sup>, Sandeep Singh<sup>b</sup>, Nita Dilawar<sup>c</sup>, Subramaniam Nagarajan<sup>d</sup> and Govind Gupta<sup>†,a</sup> \*

<sup>†</sup>Academy of Science & Innovative Research (AcSIR), CSIR-NPL Campus, Dr. K.S. Krishnan Road, New Delhi-110012, India.

<sup>a</sup>Physics of Energy Harvesting Division, CSIR-National Physical Laboratory, Dr K S Krishnan Road, New Delhi-110012, India.

<sup>b</sup>Sophisticated and Analytical Instrumentation, CSIR-National Physical Laboratory (CSIR-NPL), Dr. K.S. Krishnan Road, New Delhi-110012, India.

<sup>c</sup>Apex Level Standards & Industrial Metrology, CSIR-National Physical Laboratory (CSIR-NPL), Dr. K.S. Krishnan Road, New Delhi-110012, India.

<sup>d</sup>Department of Micro and Nanosciences, Aalto University, P.O. Box 13500, FI-00076 Aalto, Finland.

\*Corresponding Author

E-mail address: [govind@nplindia.org](mailto:govind@nplindia.org), Tel.: +91-11-45608403, Fax: +91-11-4560-9310

### Supplement Information

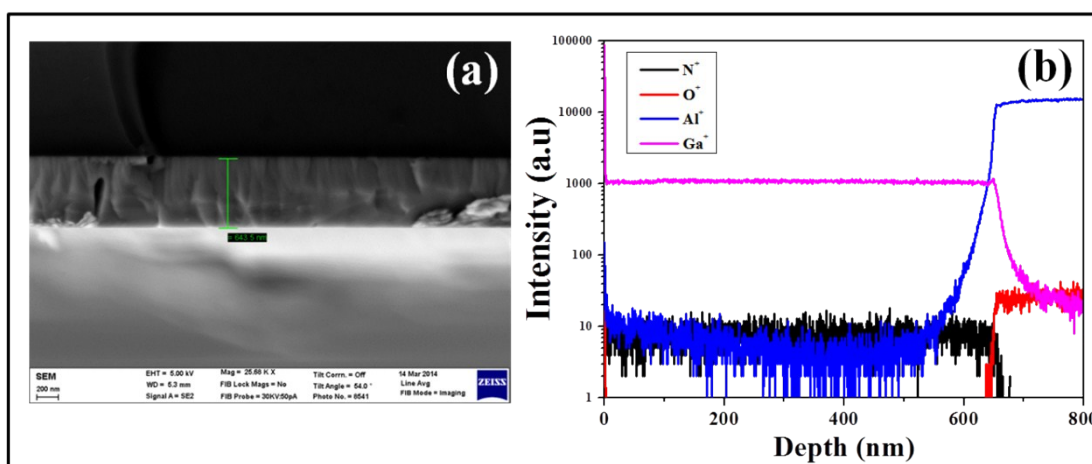

A-1: a) Cross sectional FESEM image of sample S2 and b) SIMS spectra showing the depth profile of sample S2.

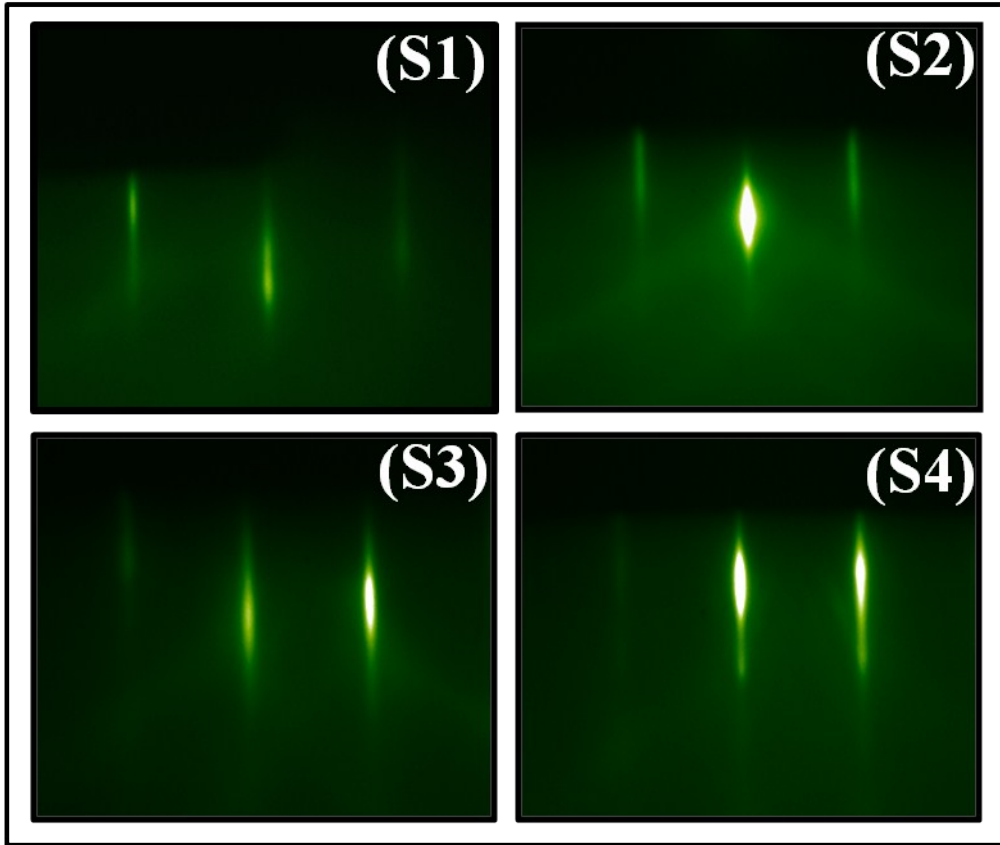

A-2: a) RHEED images of GaN samples S1, S2, S3 and S4 along  $(11\bar{2}0)$  zone axes.

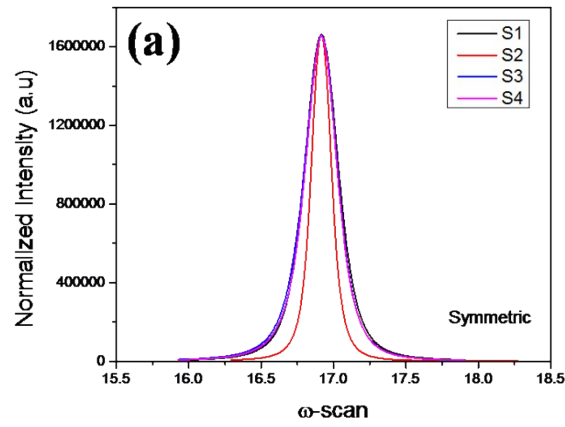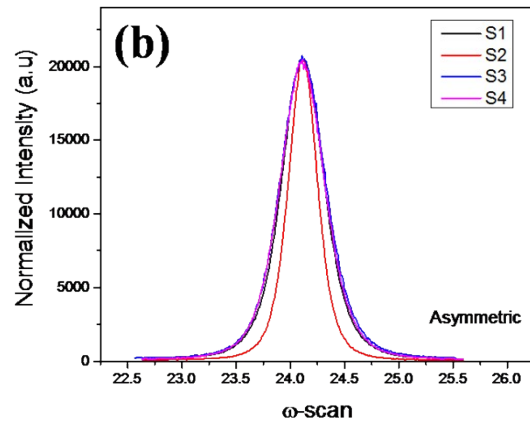

A-3: HRXRD  $\omega$ -scan of a) symmetric b) asymmetric plane diffraction of GaN film grown at different temperature.

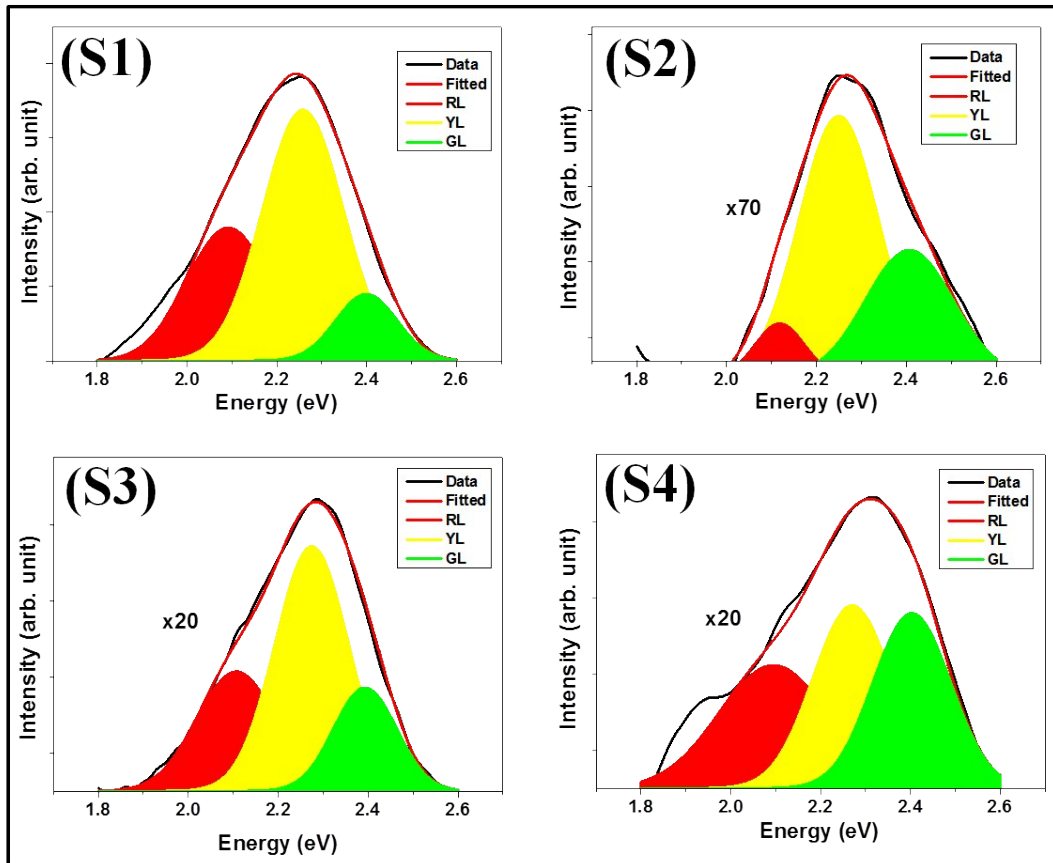

A-4: De-convoluted defect band spectra of sample S1, S2, S3 and S4 showing various defect emissions.
